# Supplementary material
Source: MDPI journal article supplement (https://www.mdpi.com/2624-8549/5/4/151)
Supplement: s1 [file s1 › chemistry-2626809-supplementary.pdf]

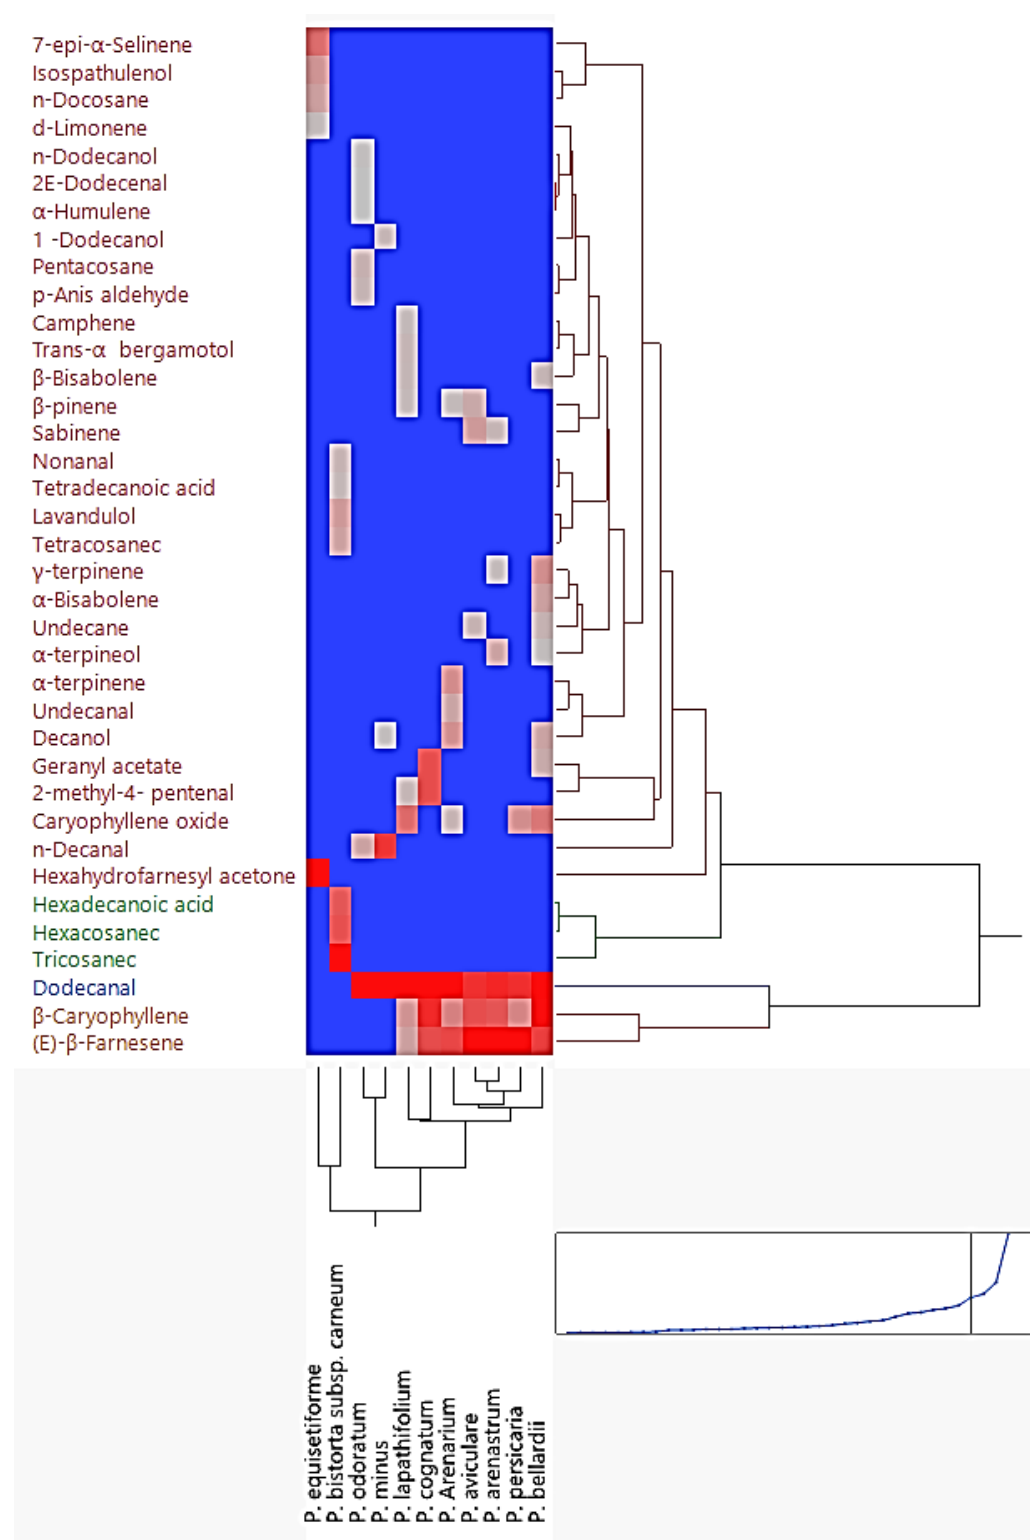

**Figure S1.** Correlation matrix between the different studies *Polygonum* species and their essential oils compounds.
